# Supplementary material for: In Vitro Screening of Three Indian Medicinal Plants for Their Phytochemicals, Anticholinesterase, Antiglucosidase, Antioxidant, and Neuroprotective Effects
Source: Biomed Res Int. 2017 Oct 24;2017:5140506. doi: 10.1155/2017/5140506 (PMC5674485; doi:10.1155/2017/5140506)
Supplement: Supplementary file 1 — Figure S1: Steady-state inhibition of AChE (A), BuChE (B), alpha–Glucosidase (C) by most active fraction (PIC) from Pevetta indica. (Left) Lineweaver Burk plots; (right) secondary plots of the Lineweaver Burk plots. Figure S2: Steady-state inhibition of AChE (A), BChE (B), alpha–Glucosidase (C)) by most active fraction (OOC) from Ochna obtusata. (Left) Lineweaver Burk plots; (right) secondary plots of the Lineweaver Burk plots. Figure S3a: Inhibitory study of Acalifa alnifolia towards AChE. Figure S3b: Inhibitory study of Acalifa alnifolia towards BuChE. Figure S3c: Inhibitory study of Acalifa alnifolia towards alpha-glucosidase. Figure S4a: Inhibitory study of Pavetta indica towards AChE. Figure S4b: Inhibitory study of Pavetta indica towards BuChE. Figure S4c: Inhibitory study of Pavetta indica towards alpha-glucosidase. Figure S5a: Inhibitory study of Ochna obtusata towards AChE. Figure S5b: Inhibitory study of Ochna obtusata towards BuChE. Figure S5c: Inhibitory study of Ochna obtusata towards alpha-glucosidase. [file 5140506.f1.docx]

Kinetic Study of Pevetta indica on AChE, BuChE and α-Glucosidase

|  |  |  |
| --- | --- | --- |
|  |  |  |
|  |  |  |

Figure S1: Steady-state inhibition of AChE (A), BuChE (B), α–Glucosidase (C) by most active fraction (PIC) from Pevetta indica. (Left) Lineweaver Burk plots; (right) secondary plots of the Lineweaver Burk plots

Kinetic Study of *Ochna obtusata* on AChE, BuChE,and α-Glucosidase

|  |  |  |
| --- | --- | --- |
|  |  |  |
|  |  |  |

Figure S2: Steady-state inhibition of AChE (A), BChE (B), α–Glucosidase (C)) by most active fraction (OOC) from *Ochna obtusata.* (Left) Lineweaver Burk plots; (right) secondary plots of the Lineweaver Burk plots

Figure S3a: Inhibitory study of *Acalifa alnifolia* towards AChE.

| Con.c MeOH CHCl3 n-BuOH H2O   | 15 | 25.64 | 38.5 | 16.9 | 24.87 | | --- | --- | --- | --- | --- | | 30 | 40.68 | 42.1 | 25.36 | 39.47 | | 90 | 57.61 | 65 | 32.89 | 50.17 | | 150 | 67.26 | 87 | 43.64 | 63.64 | |  |
| --- | --- | --- | --- | --- | --- | --- | --- | --- | --- | --- | --- | --- | --- | --- | --- | --- | --- | --- | --- | --- | --- |
| Con.c MeOH CHCl3 n-BuOH H2O   | 15 | 21.36 | 41.5 | 20.694 | 21.24 | | --- | --- | --- | --- | --- | | 30 | 45.29 | 49.64 | 27.98 | 40.36 | | 90 | 51.31 | 68.35 | 35.18 | 52.28 | | 150 | 65.61 | 80.69 | 50.19 | 69.64 | |  |
| Con.c MeOH CHCl3 n-BuOH H2O   | 15 | 20.36 | 35.69 | 8.94 | 10.26 | | --- | --- | --- | --- | --- | | 30 | 41.26 | 44.67 | 26.19 | 25.026 | | 90 | 57.32 | 61.36 | 37.29 | 40.26 | | 150 | 68.94 | 77.39 | 45.49 | 45.69 | |  |  |  |  |  | |  |

Figure S3b: Inhibitory study of *Acalifa alnifolia* towards BuChE.

| Con.c MeOH CHCl3 n-BuOH H2O   | 15 | 30.25 | 34 | 18.96 | 31.13 | | --- | --- | --- | --- | --- | | 30 | 42.25 | 59 | 25.6 | 42.25 | | 90 | 66.29 | 68 | 41.05 | 51.26 | | 150 | 80.58 | 75 | 50.28 | 64.98 | |  |
| --- | --- | --- | --- | --- | --- | --- | --- | --- | --- | --- | --- | --- | --- | --- | --- | --- | --- | --- | --- | --- | --- |
| Con.c MeOH CHCl3  n-BuOH H2O   | 15 | 27.9 | 30.36 | 20.59 | 29.25 | | --- | --- | --- | --- | --- | | 30 | 40.6 | 55.28 | 30.69 | 40.18 | | 90 | 65.18 | 64.27 | 39.58 | 55.69 | | 150 | 83.69 | 76.64 | 55.69 | 70.29 | |  |
| Con.c MeOH CHCl3  n-BuOH H2O   | 15 | 25.69 | 24.01 | 32.58 | 27.12 | | --- | --- | --- | --- | --- | | 30 | 35.29 | 39.27 | 44.59 | 48.59 | | 90 | 41.36 | 60.21 | 50.19 | 60.21 | | 150 | 56.36 | 88.89 | 75.16 | 72.16 | |  |

Figure S3c: Inhibitory study of *Acalifa alnifolia* towards α-glucosidase.

| Con.c MeOH CHCl3 n-BuOH H2O   | 15 | 35.35 | 30.35 | 15.19 | 21.25 | | --- | --- | --- | --- | --- | | 30 | 50.13 | 46.13 | 25.18 | 37.68 | | 90 | 65.35 | 60.35 | 31.29 | 51.28 | | 150 | 77.16 | 77.16 | 45.28 | 62.28 | |  |  |  |  |  | |  |  |  |  |  | |  |
| --- | --- | --- | --- | --- | --- | --- | --- | --- | --- | --- | --- | --- | --- | --- | --- | --- | --- | --- | --- | --- | --- | --- | --- | --- | --- | --- | --- | --- | --- | --- | --- |
| Con.c MeOH CHCl3 n-BuOH H2O   | 15 | 32.26 | 31.25 | 21.35 | 19.27 | | --- | --- | --- | --- | --- | | 30 | 45.21 | 50.26 | 26.59 | 24.29 | | 90 | 57.29 | 62.19 | 33.26 | 49.26 | | 150 | 79.31 | 70.29 | 47.16 | 60.25 | |  |  |  |  |  | |  |  |  |  |  | |  |
| Con.c MeOH CHCl3 n-BuOH H2O   | 15 | 27.29 | 27.12 | 20.15 | 22.25 | | --- | --- | --- | --- | --- | | 30 | 40.19 | 48.59 | 27.16 | 35.28 | | 90 | 55.27 | 60.21 | 38.16 | 50.16 | | 150 | 72.16 | 72.16 | 48.26 | 61.26 | |  |  |  |  |  | |  |

Figure S4a: Inhibitory study of *Pavetta indica* towards AChE.

| Con.c MeOH CHCl3 n-BuOH H2O   | 15 | 52.26 | 25.59 | 25.16 | 17.36 | | --- | --- | --- | --- | --- | | 30 | 58.69 | 36.69 | 31.25 | 30.25 | | 90 | 71.26 | 57.69 | 47.11 | 42.69 | | 150 | 81.26 | 71.29 | 58.49 | 60.26 | |  |
| --- | --- | --- | --- | --- | --- | --- | --- | --- | --- | --- | --- | --- | --- | --- | --- | --- | --- | --- | --- | --- | --- |
| Con.c MeOH CHCl3 n-BuOH H2O   | 15 | 42.26 | 27.59 | 22.15 | 16.29 | | --- | --- | --- | --- | --- | | 30 | 55.29 | 39.58 | 34.97 | 31.26 | | 90 | 67.369 | 58.46 | 45.69 | 44.19 | | 150 | 77.49 | 78.59 | 60.59 | 58.59 | |  |
| Con.c MeOH CHCl3 n-BuOH H2O   | 15 | 49.58 | 21.25 | 20.15 | 18.29 | | --- | --- | --- | --- | --- | | 30 | 60.36 | 35.27 | 35.29 | 32.26 | | 90 | 74.26 | 60.28 | 50.27 | 45.29 | | 150 | 85.59 | 75.29 | 61.29 | 59.68 | |  |  |  |  |  | |  |

Figure S4b: Inhibitory study of *Pavetta indica* towards BuChE.

| Con.c MeOH CHCl3 n-BuOH H2O   | 15 | 47.3 | 22.19 | 21.02 | 11.07 | | --- | --- | --- | --- | --- | | 30 | 60.26 | 30.26 | 37.89 | 17.49 | | 90 | 71.26 | 42.29 | 55.26 | 27.18 | | 150 | 88.59 | 51.29 | 62.37 | 44.6 | |  |  |  |  |  | |  |  |  |  |  | |  |
| --- | --- | --- | --- | --- | --- | --- | --- | --- | --- | --- | --- | --- | --- | --- | --- | --- | --- | --- | --- | --- | --- | --- | --- | --- | --- | --- | --- | --- | --- | --- | --- |
| Con.c MeOH CHCl3 n-BuOH H2O   | 15 | 45.26 | 20.16 | 20.14 | 9.58 | | --- | --- | --- | --- | --- | | 30 | 57.98 | 27.98 | 33.27 | 15.27 | | 90 | 69.69 | 41.16 | 51.36 | 30.28 | | 150 | 82.16 | 55.29 | 63.27 | 37.19 | |  |  |  |  |  | |  |
| Con.c MeOH CHCl3 n-BuOH H2O   | 15 | 49.69 | 19.59 | 18.69 | 10.02 | | --- | --- | --- | --- | --- | | 30 | 58.94 | 31.26 | 30.25 | 14.16 | | 90 | 70.18 | 43.19 | 50.14 | 33.16 | | 150 | 80.15 | 50.29 | 65.29 | 39.46 | |  |  |  |  |  | |  |

Figure S4c: Inhibitory study of *Pavetta indica* towards α-glucosidase.

| Con.c MeOH CHCl3 n-BuOH H2O   | 15 | 32.25 | 38.26 | 21.18 | 30.15 | | --- | --- | --- | --- | --- | | 30 | 45.26 | 50.26 | 30.25 | 42.25 | | 90 | 66.569 | 64.19 | 48.59 | 53.26 | | 150 | 78.29 | 72.19 | 57.89 | 68.39 | |  |  |  |  |  | |  |
| --- | --- | --- | --- | --- | --- | --- | --- | --- | --- | --- | --- | --- | --- | --- | --- | --- | --- | --- | --- | --- | --- | --- | --- | --- | --- | --- |
| Con.c MeOH CHCl3 n-BuOH H2O   | 15 | 30.25 | 32.02 | 20.12 | 37.26 | | --- | --- | --- | --- | --- | | 30 | 43.12 | 51.05 | 29.59 | 44.15 | | 90 | 65.13 | 61.02 | 45.79 | 57.69 | | 150 | 76.14 | 73.28 | 60.25 | 64.12 | |  |  |  |  |  | |  |
| Con.c MeOH CHCl3 n-BuOH H2O   | 15 | 31.15 | 33.02 | 25.14 | 33.28 | | --- | --- | --- | --- | --- | | 30 | 45.17 | 55.15 | 34.58 | 47.49 | | 90 | 61.12 | 60.58 | 46.26 | 60.15 | | 150 | 72.25 | 70.15 | 61.04 | 70.18 | |  |

Figure S5a: Inhibitory study of *Ochna obtusata* towards AChE.

| Con.c MeOH CHCl3 n-BuOH H2O   | 15 | 49.68 | 41.01 | 16.76 | 8.76 | | --- | --- | --- | --- | --- | | 30 | 57.15 | 54.19 | 24.19 | 19.49 | | 90 | 69.25 | 67.46 | 38.58 | 22.19 | | 150 | 78.25 | 81.07 | 45.28 | 44.28 | |  |  |  |  |  | |  |  |  |  |  | |  |
| --- | --- | --- | --- | --- | --- | --- | --- | --- | --- | --- | --- | --- | --- | --- | --- | --- | --- | --- | --- | --- | --- | --- | --- | --- | --- | --- | --- | --- | --- | --- | --- |
| Con.c MeOH CHCl3 n-BuOH H2O   | 15 | 48.19 | 40.29 | 20.18 | 4.69 | | --- | --- | --- | --- | --- | | 30 | 58.79 | 55.18 | 31.15 | 20.19 | | 90 | 72.49 | 68.17 | 40.25 | 28.97 | | 150 | 81.26 | 80.79 | 49.87 | 38.49 | |  |  |  |  |  | |  |
| Con.c MeOH CHCl3 n-BuOH H2O   | 15 | 46.28 | 38.48 | 18.57 | 9.57 | | --- | --- | --- | --- | --- | | 30 | 60.25 | 56.17 | 32.57 | 22.15 | | 90 | 77.49 | 67.49 | 44.58 | 37.19 | | 150 | 86.97 | 85.59 | 51.27 | 47.19 | |  |  |  |  |  | |  |  |  |  |  | |  |

Figure S5b: Inhibitory study of *Ochna obtusata* towards BuChE.

| Con.c MeOH CHCl3 n-BuOH H2O   | 15 | 48.36 | 45.28 | 13.67 | 11.14 | | --- | --- | --- | --- | --- | | 30 | 62.19 | 57.26 | 21.15 | 16.89 | | 90 | 80.19 | 62.18 | 46.59 | 25.26 | | 150 | 91.59 | 80.26 | 61.23 | 37.25 | |  |
| --- | --- | --- | --- | --- | --- | --- | --- | --- | --- | --- | --- | --- | --- | --- | --- | --- | --- | --- | --- | --- | --- |
| Con.c MeOH CHCl3 n-BuOH H2O   | 15 | 48.18 | 50.29 | 19.15 | 10.25 | | --- | --- | --- | --- | --- | | 30 | 58.18 | 64.19 | 27.16 | 15.29 | | 90 | 66.18 | 78.49 | 45.69 | 24.59 | | 150 | 78.95 | 89.46 | 60.25 | 31.26 | |  |  |  |  |  | |  |
| Con.c MeOH CHCl3 n-BuOH H2O   | 15 | 45.26 | 51.12 | 20.26 | 11.25 | | --- | --- | --- | --- | --- | | 30 | 55.59 | 65.19 | 31.25 | 16.59 | | 90 | 70.25 | 74.56 | 47.16 | 29.15 | | 150 | 81.25 | 84.59 | 66.28 | 37.69 | |  |  |  |  |  | |  |

Figure S5c: Inhibitory study of *Ochna obtusata* towards α-glucosidase.

| Con.c MeOH CHCl3 n-BuOH H2O   | 15 | 41.25 | 32.17 | 19.69 | 15.69 | | --- | --- | --- | --- | --- | | 30 | 50.18 | 45.26 | 30.16 | 30.21 | | 90 | 70.16 | 62.21 | 46.69 | 45.26 | | 150 | 81.26 | 71.12 | 58.98 | 55.28 | |  |  |  |  |  | |  |
| --- | --- | --- | --- | --- | --- | --- | --- | --- | --- | --- | --- | --- | --- | --- | --- | --- | --- | --- | --- | --- | --- | --- | --- | --- | --- | --- |
| Con.c MeOH CHCl3 n-BuOH H2O   | 15 | 37.16 | 31.25 | 21.02 | 16.58 | | --- | --- | --- | --- | --- | | 30 | 48.65 | 43.69 | 35.26 | 32.15 | | 90 | 65.59 | 65.21 | 49.65 | 44.16 | | 150 | 80.16 | 80.15 | 60.28 | 58.69 | |  |
| Con.c MeOH CHCl3 n-BuOH H2O   | 15 | 40.16 | 29.21 | 22.12 | 20.15 | | --- | --- | --- | --- | --- | | 30 | 51.61 | 47.69 | 34.69 | 40.16 | | 90 | 69.94 | 70.12 | 50.26 | 50.16 | | 150 | 84.61 | 79.021 | 61.02 | 60.28 | |  |  |  |  |  | |  |  |  |  |  | |  |  |  |  |  | |  |
